# Supplementary material for: Prognostic value of coronary computed tomography angiographic derived fractional flow reserve: a systematic review and meta-analysis
Source: HighWire-hosted journal article supplement (doi:10.1136/heartjnl-2021-319773), 2021-10-22
Supplement: heartjnl-2021-319773supp001_data_supplement.pdf [file heartjnl-2021-319773supp001_data_supplement.pdf]

Supplementum

Prognostic Value of FFR<sub>CT</sub>: A Systematic Review and Meta-analysis

Nørgaard BL, Gaur S, Fairbairn TA, Douglas PS, Jensen JM, Patel MR, Ihdayhid

AR, Ko B, Sellers SL, Weir-McCall JR, Matsuo H, Sand NP, Øvrehus KA, Rogers

C, Mullen S, Nieman K , Parner E, Leipsic J, and Abdulla J

**STable 1.** Search strategy in individual databases and reference screening of included and relevant review papers

**STable 2.** Meta-Analysis Newcastle-Ottawa Quality Scale

**SFigure 1.** Meta-analysis of the primary composite endpoint (death or any MI) and secondary endpoints at 12 months follow-up after exclusion of the ADVANCE registry data

**SFigure 2.** Meta-analysis of the occurrence of revascularization between 3 and 12 months of follow-up

**STable 1.** Search Strategy in Individual Databases and Reference Screening of Included and Relevant Review Papers

| Database         | Search strategy and syntaxes                                                                                                                                                                                                                                                                                                                                                                                                                                                                                                                                                                                                                                        | Number of retrieved articles |
|------------------|---------------------------------------------------------------------------------------------------------------------------------------------------------------------------------------------------------------------------------------------------------------------------------------------------------------------------------------------------------------------------------------------------------------------------------------------------------------------------------------------------------------------------------------------------------------------------------------------------------------------------------------------------------------------|------------------------------|
| Pubmed (Medline) | ((("computed tomography angiography"[MeSH Terms] OR ("computed"[All Fields] AND "tomography"[All Fields] AND "angiography"[All Fields]) OR "computed tomography angiography"[All Fields]) AND ("heart"[MeSH Terms] OR "heart"[All Fields] OR "coronary"[All Fields]) AND fractional[All Fields] AND flow[All Fields] AND reserve[All Fields] AND ("prognosis"[MeSH Terms] OR "prognosis"[All Fields])) AND ("loattrfull text"[sb] AND ("2010/01/01"[PDAT] : "2020/12/31"[PDAT]) AND English[lang])                                                                                                                                                                  | 162                          |
|                  | ((("computed tomography angiography"[MeSH Terms] OR ("computed"[All Fields] AND "tomography"[All Fields] AND "angiography"[All Fields]) OR "computed tomography angiography"[All Fields]) AND ("heart"[MeSH Terms] OR "heart"[All Fields] OR "coronary"[All Fields]) AND fractional[All Fields] AND flow[All Fields] AND reserve[All Fields] AND ("death"[MeSH Terms] OR "death"[All Fields])) AND ("loattrfull text"[sb] AND ("2010/01/01"[PDAT] : "2020/12/31"[PDAT]) AND English[lang])                                                                                                                                                                          | 46                           |
|                  | ((("computed tomography angiography"[MeSH Terms] OR ("computed"[All Fields] AND "tomography"[All Fields] AND "angiography"[All Fields]) OR "computed tomography angiography"[All Fields]) AND ("heart"[MeSH Terms] OR "heart"[All Fields] OR "coronary"[All Fields]) AND fractional[All Fields] AND flow[All Fields] AND reserve[All Fields] AND ("myocardial infarction"[MeSH Terms] OR ("myocardial"[All Fields] AND "infarction"[All Fields]) OR "myocardial infarction"[All Fields])) AND ("loattrfull text"[sb] AND ("2010/01/01"[PDAT] : "2020/12/31"[PDAT]) AND English[lang])                                                                               | 62                           |
|                  | ((("computed tomography angiography"[MeSH Terms] OR ("computed"[All Fields] AND "tomography"[All Fields] AND "angiography"[All Fields]) OR "computed tomography angiography"[All Fields]) AND ("heart"[MeSH Terms] OR "heart"[All Fields] OR "coronary"[All Fields]) AND fractional[All Fields] AND flow[All Fields] AND reserve[All Fields] AND ("myocardial infarction"[MeSH Terms] OR ("myocardial"[All Fields] AND "infarction"[All Fields]) OR "outcome"[All Fields])) AND ("loattrfull text"[sb] AND ("2010/01/01"[PDAT] : "2019/12/31"[PDAT]) AND English[lang]) AND ("loattrfull text"[sb] AND ("2010/01/01"[PDAT] : "2020/12/31"[PDAT]) AND English[lang]) | 100                          |

|                                                                     |                                                                                                                                                                                                                                                                                                                                                                           |     |
|---------------------------------------------------------------------|---------------------------------------------------------------------------------------------------------------------------------------------------------------------------------------------------------------------------------------------------------------------------------------------------------------------------------------------------------------------------|-----|
|                                                                     |                                                                                                                                                                                                                                                                                                                                                                           |     |
|                                                                     | Total results of Pubmed                                                                                                                                                                                                                                                                                                                                                   | 370 |
| Web of science                                                      | computed tomography angiography and coronary fractional flow reserve and prognosis<br>Refined by: WEB OF SCIENCE CATEGORIES: (CARDIAC CARDIOVASCULAR SYSTEMS) AND DOCUMENT TYPES: (ARTICLE) AND LANGUAGES: (ENGLISH)<br>AND DOCUMENT TYPES: (ARTICLE) Timespan: 2010-2020. Indexes: SCI-EXPANDED, SSCI, A&HCI, CPCI-S, CPCI-SSH, BKCI-S, BKCI-SSH, ESCI, CCR-EXPANDED, IC | 20  |
|                                                                     | computed tomography angiography and coronary fractional flow reserve and death<br>Refined by: WEB OF SCIENCE CATEGORIES: (CARDIAC CARDIOVASCULAR SYSTEMS) AND DOCUMENT TYPES: (ARTICLE) AND LANGUAGES: (ENGLISH)<br>Timespan: 2010-2020. Indexes: SCI-EXPANDED, SSCI, A&HCI, CPCI-S, CPCI-SSH, BKCI-S, BKCI-SSH, ESCI, CCR-EXPANDED, IC.                                  | 47  |
|                                                                     | computed tomography angiography and coronary fractional flow reserve and myocardial infarction. Refined by: LANGUAGES: (ENGLISH) AND WEB OF SCIENCE CATEGORIES: (CARDIAC CARDIOVASCULAR SYSTEMS) AND DOCUMENT TYPES: (ARTICLE). Timespan: 2010-2020. Indexes: SCI-EXPANDED, SSCI, A&HCI, CPCI-S, CPCI-SSH, BKCI-S, BKCI-SSH, ESCI, CCR-EXPANDED, IC.                      | 81  |
|                                                                     | Total results of Web of science                                                                                                                                                                                                                                                                                                                                           | 148 |
| Total results of all electronic search                              |                                                                                                                                                                                                                                                                                                                                                                           | 518 |
| Total results of reference screening of eligible papers and reviews |                                                                                                                                                                                                                                                                                                                                                                           | 218 |
| Total results                                                       |                                                                                                                                                                                                                                                                                                                                                                           | 736 |
| Duplicates                                                          |                                                                                                                                                                                                                                                                                                                                                                           | 406 |
| Number of retrieved results for evaluation                          |                                                                                                                                                                                                                                                                                                                                                                           | 330 |

**STable 2.** Meta-Analysis Newcastle-Ottawa Quality Scale

| Study                                            | Selection | Comparability | Outcome | Total score |
|--------------------------------------------------|-----------|---------------|---------|-------------|
| PLATFORM study,<br>Douglas P et al (17), 2016    | ****      | **            | **      | 8           |
| Aarhus study<br>Norgaard BL et al (16), 2018     | ****      | **            | **      | 8           |
| ADVANCE Registry,<br>Patel M et al (18), 2020    | ****      | **            | **      | 8           |
| NXT study,<br>Ihdayhid AR et al (22), 2019       | ****      | **            | **      | 8           |
| Vancouver study,<br>McNabney CG et al (23), 2019 | ****      | **            | **      | 8           |

**Figure 1.** Meta-analysis of the primary composite endpoint (death or any MI) and secondary endpoints at 12 months follow-up after exclusion of the ADVANCE registry data

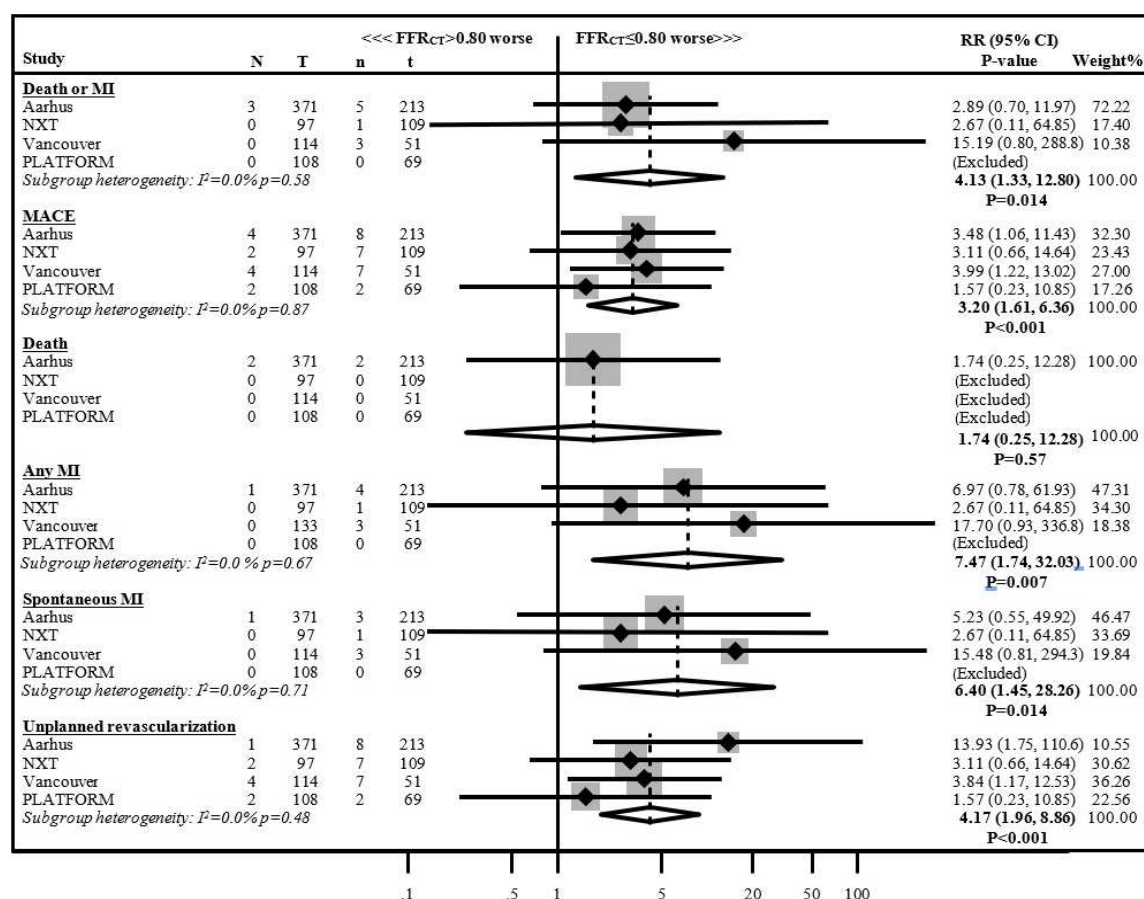

$FFR_{CT} > 0.80$ : N = number of patients with adverse events; T= total number of patients.  $FFR_{CT} \leq 0.80$ : n and t =number of patients with adverse events and total number of patients. Strata with zero events were not included in the analysis. MACE (major adverse cardiac events) was defined as a composite of death, any MI or unplanned revascularization. Abbreviations and acronyms: CI, confidence interval;  $FFR_{CT}$ , CTA derived fractional flow reserve; MI, myocardial infarction; NXT, "Analysis of Coronary Blood Flow Using CT Angiography: Next Steps" trial; PLATFORM, "Prospective Longitudinal Trial of  $FFR_{CT}$ : Outcome and Resource impacts" trial; RR, risk ratio

**SFigure 2.** Meta-analysis of the occurrence of revascularization between 3 and 12 months of follow-up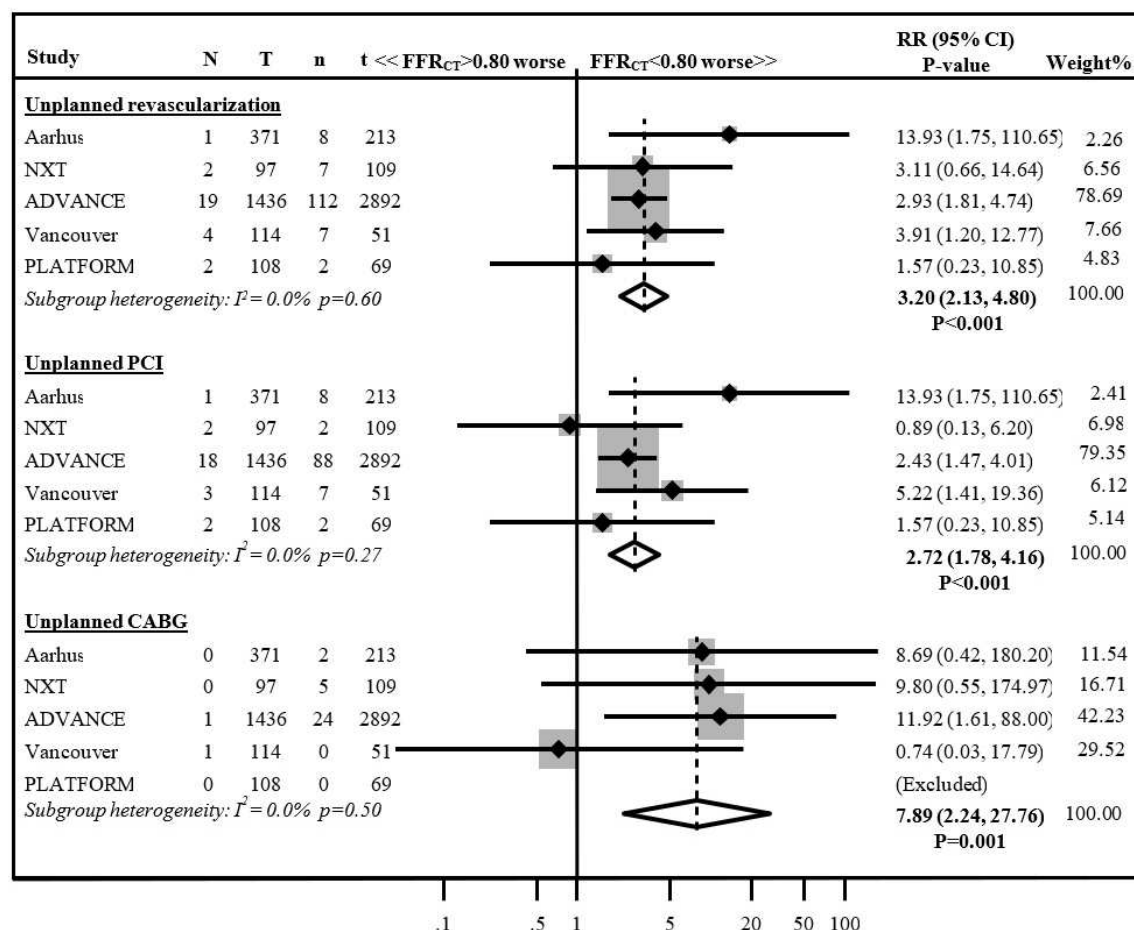

FFR<sub>CT</sub> >0.80: N=number of patients in whom unplanned revascularization was performed; T=total number of patients. FFR<sub>CT</sub> ≤0.80: n and t = number of patients in whom unplanned revascularization was performed and total number of patients. Strata with zero events were not included in the analysis. Unplanned revascularization was defined as a procedure performed >3 months from the time of the CTA investigation. Abbreviations and acronyms: ADVANCE, "Assessing Diagnostic Value of Non-invasive FFR<sub>CT</sub> in Coronary Care" study; CABG, coronary artery by-pass grafting; CI, confidence interval; FFR<sub>CT</sub>, CTA derived fractional flow reserve; NXT, "Analysis of Coronary Blood Flow Using CT Angiography: Next Steps" trial; PCI, percutaneous coronary intervention; PLATFORM, "Prospective Longitudinal Trial of FFR<sub>CT</sub>: Outcome and Resource impacts" trial; RR, risk ratio
